# Supplementary material for: “It’s hard for us men to go to the clinic. We naturally have a fear of hospitals.” Men’s risk perceptions, experiences and program preferences for PrEP: A mixed methods study in Eswatini
Source: PubMed Central journal article supplement (PMC7510987; doi:10.1371/journal.pone.0237427), 2020-09-23
Supplement: pone.0237427.s001.pdf [file pone.0237427.s001.pdf]

**PrEP for HIV Prevention: Part A Risk assessment**

Facility name: \_\_\_\_\_

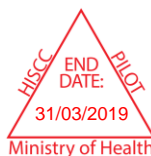

[insert serial number]

Date: DD MM YYYY

**Consent for screening:**  Yes →  First time PrEP Screening  Repeat screening  
 No

**Sex:**  Male  Female  Transgender

**DOB:** DD MM YYYY

**Reason for visit:**  PrEP  VCT  OPD  STI treatment  ANC  PNC  
 FP  Other, \_\_\_\_\_  Referral # \_\_\_\_\_

**Relationship status:**  Single, no relationship  One partner, living together  
 Multiple partners  One partner, not living together

**Partner HIV status:**  Negative  Positive  Unknown  No answer

**If partner HIV-positive:**  Partner on ART  Partner **NOT** on ART  Unknown partner ART status

**Education:**  None  Secondary  
 Primary  Tertiary

**HIV test date:** DD MM YYYY  Non-reactive  Indeterminate  Reactive →  Linked to ART

HTS register #: \_\_\_\_\_

Perceived risk: On a scale of 1-5, how high does the client perceive his/ her risk to get HIV. Circle the correct number.  
 1: No risk      2: Low risk      3: Some risk      4: High risk      5: Very high risk

| In the past SIX months:                                                                                                          |                              |                             |
|----------------------------------------------------------------------------------------------------------------------------------|------------------------------|-----------------------------|
| 1. Have you had unprotected (condom-less) sex?                                                                                   | <input type="checkbox"/> Yes | <input type="checkbox"/> No |
| 2. Have you had sex with partners who are HIV positive or whose HIV status you did not know?                                     | <input type="checkbox"/> Yes | <input type="checkbox"/> No |
| 3. Have you had a sexually transmitted infection?                                                                                | <input type="checkbox"/> Yes | <input type="checkbox"/> No |
| 4. Have you been using post-exposure prophylaxis (PEP)?                                                                          | <input type="checkbox"/> Yes | <input type="checkbox"/> No |
| 5. Have you had sex under the influence of alcohol and/or drugs?                                                                 | <input type="checkbox"/> Yes | <input type="checkbox"/> No |
| 6. Have you experienced or do you expect any situations which you consider to be risky for acquiring HIV? If yes, specify: _____ | <input type="checkbox"/> Yes | <input type="checkbox"/> No |

**If known, indicate if the client belongs to any of the following target populations (tick any that apply):**

- Young woman 16 – 25 years  Yes  No
- In sero-discordant relationship:  Yes  No  Unknown
- Sex worker:  Yes  No  Unknown
- MSM:  Yes  No  Unknown
- Client with current STI:  Yes  No  Unknown
- Pregnant:  Yes **EDD:** DD MM YYYY  
 No **LMP:** DD MM YYYY
- Lactating:  Yes  No

**Other at risk as per risk assessment:**

Yes  No

If yes, specify: \_\_\_\_\_

**Comments:** \_\_\_\_\_  
 \_\_\_\_\_

**Conclusion:**

- Client at substantial risk for HIV infection and interested in PrEP  
 → Continue with eligibility assessment on next page
- Client at substantial risk for HIV infection and **NO** interest in PrEP  
 → Discuss, offer and/ or refer for other HIV prevention services
- Client not at substantial risk for HIV infection  
 → Discuss, offer and/ or refer for other HIV prevention services

**Provided counselling on:**

- Condoms
- VMMC →  Referred for VMMC
- Delayed sexual debut
- Reducing # of sexual partners
- STIs
- Partner testing
- Test and Start
- Other, specify: \_\_\_\_\_

Initial & Date (Clinic Staff): \_\_\_\_\_

Initial & Date (Data Staff): \_\_\_\_\_

**PrEP for HIV Prevention: Part B Eligibility assessment**

**Acute HIV Infection (AHI)**  
 In the past 3 days have you had any of the following symptoms?

|                       |                              |                             |
|-----------------------|------------------------------|-----------------------------|
| Sore throat           | <input type="checkbox"/> Yes | <input type="checkbox"/> No |
| Fever                 | <input type="checkbox"/> Yes | <input type="checkbox"/> No |
| Night sweats          | <input type="checkbox"/> Yes | <input type="checkbox"/> No |
| Swollen glands        | <input type="checkbox"/> Yes | <input type="checkbox"/> No |
| Mouth ulcers          | <input type="checkbox"/> Yes | <input type="checkbox"/> No |
| Headache              | <input type="checkbox"/> Yes | <input type="checkbox"/> No |
| Rash                  | <input type="checkbox"/> Yes | <input type="checkbox"/> No |
| Generalized body pain | <input type="checkbox"/> Yes | <input type="checkbox"/> No |
| Intense fatigue       | <input type="checkbox"/> Yes | <input type="checkbox"/> No |

**Possible exposure to HIV in the last 14 days:**  Yes  No

≥1 symptom + possible exposure  
 → Suspect AHI, defer PrEP initiation

≥1 symptom + no exposure  
 → Differential diagnosis: \_\_\_\_\_

TB screening:  Neg.  Pos.  Active TB

**STI symptom screening**  
 In the past 3 days have you had any symptoms of an STI?

|                                |                              |                             |
|--------------------------------|------------------------------|-----------------------------|
| Genital sore or ulcer          | <input type="checkbox"/> Yes | <input type="checkbox"/> No |
| Vaginal/penile/anal discharge  | <input type="checkbox"/> Yes | <input type="checkbox"/> No |
| Vulval/penile itching /burning | <input type="checkbox"/> Yes | <input type="checkbox"/> No |
| Lower abdominal pain           | <input type="checkbox"/> Yes | <input type="checkbox"/> No |
| Scrotal swelling               | <input type="checkbox"/> Yes | <input type="checkbox"/> No |
| Inguinal bubo                  | <input type="checkbox"/> Yes | <input type="checkbox"/> No |

Differential diagnosis: \_\_\_\_\_

**RPR / Syphilis (if symptomatic)**  Yes  No

Date tested: **DD MM YYYY**

Result:  Non-reactive  Reactive →  Rx given

**Hepatitis B test and vaccination**

HBsAg test date: **DD MM YYYY** Result:  Neg.  Pos.

**If HBsAg positive:** AST result \_\_\_\_\_ ALT result \_\_\_\_\_

Management \_\_\_\_\_

Vaccination:  Not done  Reported  Documented

**Known NCDs:**

HPT:  Yes  No

BP: \_\_\_\_\_

DM:  Yes  No

**Serum creatinine**

Date sample drawn: **DD MM YYYY** Result: \_\_\_\_\_ μmol/ L

Age : \_\_\_\_\_ years CrCl: \_\_\_\_\_ mL/min

Weight: \_\_\_\_\_ kg

  $(140 - \text{Age}) \times \text{weight in kg} \times 1.23$   
 Serum creatinine (in μmol/L)

  $(140 - \text{Age}) \times \text{weight in kg} \times 1.04$   
 Serum creatinine (in μmol/L)

| Eligibility checklist (tick all that apply)                       |                              |                             |
|-------------------------------------------------------------------|------------------------------|-----------------------------|
| 1. Participant is ≥16 years                                       | <input type="checkbox"/> Yes | <input type="checkbox"/> No |
| 2. HIV test is non-reactive                                       | <input type="checkbox"/> Yes | <input type="checkbox"/> No |
| 3. At substantial risk for HIV infection                          | <input type="checkbox"/> Yes | <input type="checkbox"/> No |
| 4. Do not suspect acute HIV infection                             | <input type="checkbox"/> Yes | <input type="checkbox"/> No |
| 5. Baseline creatinine taken                                      | <input type="checkbox"/> Yes | <input type="checkbox"/> No |
| 6. Baseline HBsAg taken                                           | <input type="checkbox"/> Yes | <input type="checkbox"/> No |
| 7. Participant is > 40 kg                                         | <input type="checkbox"/> Yes | <input type="checkbox"/> No |
| 8. Participant is willing/ able to come of follow up appointments | <input type="checkbox"/> Yes | <input type="checkbox"/> No |
| 9. No contraindications to TDF (see guidelines)                   | <input type="checkbox"/> Yes | <input type="checkbox"/> No |

**Eligible for PrEP:**  Yes  No  Pending

**Informed consent signed:**  Yes  No

**PrEP initiation:**  Yes  No  Deferred

If PrEP deferred next review date: **DD MM YYYY**

**Other services offered/ provided:**

Comments: \_\_\_\_\_

\_\_\_\_\_
